# Supplementary material for: Exploration of the sputum methylome and omics deconvolution by quadratic programming in molecular profiling of asthma and COPD: the road to sputum omics 2.0
Source: Respir Res. 2020 Oct 19;21:274. doi: 10.1186/s12931-020-01544-4 (PMC7574293; doi:10.1186/s12931-020-01544-4)
Supplement: Supplementary file 6 — Additional file 6. Results of KEGG pathway enrichment analyses of the gene expression data. [file 12931_2020_1544_MOESM6_ESM.xlsx]

## Sheet: mixed cells asthma
	ID	Description	GeneRatio	BgRatio	pvalue	p.adjust	qvalue	geneID	Count
hsa04060	hsa04060	Cytokine-cytokine receptor interaction	13/39	249/6444	1.0396e-09	8.73267e-08	8.31683e-08	IL1R2/IL5RA/CCL26/CCR3/IL18R1/CCL17/BMP6/IL1R1/IL1RL1/TNFSF14/IL3RA/CXCR1/CXCR2	13
hsa04061	hsa04061	Viral protein interaction with cytokine and cytokine receptor	7/39	92/6444	1.01834e-06	4.27704e-05	4.07337e-05	CCL26/CCR3/IL18R1/CCL17/TNFSF14/CXCR1/CXCR2	7
hsa04640	hsa04640	Hematopoietic cell lineage	5/39	92/6444	0.000208661	0.00584251	0.00556429	IL1R2/IL5RA/CD24/IL1R1/IL3RA	5
hsa04062	hsa04062	Chemokine signaling pathway	5/39	174/6444	0.00370777	0.0778632	0.0741554	CCL26/CCR3/CCL17/CXCR1/CXCR2	5

## Sheet: mixed cells COPD
	ID	Description	GeneRatio	BgRatio	pvalue	p.adjust	qvalue	geneID	Count
hsa04060	hsa04060	Cytokine-cytokine receptor interaction	38/342	249/6444	2.07925e-09	5.75952e-07	5.38416e-07	IL1R1/IL1RAP/BMP6/IL6R/CRLF2/TNFSF14/TNFRSF8/ACVRL1/TNFSF15/IL1R2/CXCR4/TNFRSF1B/TNFRSF9/CXCL8/IL18R1/CXCL1/CCL1/IL1RN/CCR7/CSF3R/INHBB/CSF2RB/IL10/CXCR1/CCL7/IL3RA/OSM/IL2RA/CXCR2/IL18RAP/CCR3/CCL17/CCL2/TNFRSF10C/LIF/ACKR3/PPBP/IL1RL1	38
hsa04061	hsa04061	Viral protein interaction with cytokine and cytokine receptor	21/342	92/6444	8.16645e-09	1.13105e-06	1.05734e-06	IL6R/TNFSF14/CXCR4/TNFRSF1B/CXCL8/IL18R1/CXCL1/CCL1/CCR7/IL10/CXCR1/CCL7/IL2RA/CXCR2/IL18RAP/CCR3/CCL17/CCL2/TNFRSF10C/ACKR3/PPBP	21
hsa00532	hsa00532	Glycosaminoglycan biosynthesis - chondroitin sulfate / dermatan sulfate	6/342	19/6444	0.000321786	0.0223963	0.0209367	CHST15/CSGALNACT2/CHST11/CHST7/CHSY1/CSGALNACT1	6
hsa04062	hsa04062	Chemokine signaling pathway	21/342	174/6444	0.000323412	0.0223963	0.0209367	BRAF/PRKCB/PAK1/GNG4/CXCR4/CXCL8/CXCL1/CCL1/CCR7/PXN/CXCR1/CCL7/GNG7/GNG2/CXCR2/BCAR1/CCR3/CCL17/CCL2/GNG11/PPBP	21
hsa05146	hsa05146	Amoebiasis	13/342	90/6444	0.000844438	0.0423958	0.0396327	IL1R1/LAMB3/PRKCB/TLR2/LAMB1/IL1R2/CXCL8/CXCL1/SERPINB9/IL10/ARG1/LAMA1/C8B	13
hsa05219	hsa05219	Bladder cancer	8/342	40/6444	0.00100014	0.0423958	0.0396327	MMP1/CDKN1A/BRAF/VEGFA/CXCL8/MMP9/DAPK2/THBS1	8
hsa05202	hsa05202	Transcriptional misregulation in cancer	18/342	152/6444	0.00107137	0.0423958	0.0396327	JMJD1C/BCL6/CDKN1A/ZEB1/PTCRA/DDIT3/MET/IL1R2/IGF1R/CXCL8/DEFA3/RUNX2/NUPR1/BIRC3/PLAU/MMP9/TRAF1/CEBPE	18
hsa04668	hsa04668	TNF signaling pathway	14/342	107/6444	0.00145832	0.0504942	0.0472034	EDN1/TNFRSF1B/IL18R1/CXCL1/IRF1/ICAM1/BIRC3/CREB5/TNFAIP3/MMP9/CCL2/TRAF1/LIF/PTGS2	14
hsa05144	hsa05144	Malaria	8/342	43/6444	0.00164104	0.0505077	0.047216	TLR2/MET/CXCL8/IL10/ICAM1/CCL2/SDC1/THBS1	8
hsa05206	hsa05206	MicroRNAs in cancer	17/342	152/6444	0.00272273	0.0754197	0.0705044	CDKN1A/ZEB1/PRKCB/NOTCH3/CYP1B1/VEGFA/MET/MARCKS/DDIT4/IRS2/STMN1/SPRY2/ITGB3/PLAU/MMP9/PTGS2/THBS1	17

## Sheet: QP deconv asthma AM
	ID	Description	GeneRatio	BgRatio	pvalue	p.adjust	qvalue	geneID	Count
hsa04660	hsa04660	T cell receptor signaling pathway	7/79	100/6444	0.000203986	0.0354936	0.0341409	CD247/ZAP70/PRKCQ/CD8A/LCK/CD8B/MAPK11	7
hsa04380	hsa04380	Osteoclast differentiation	7/79	123/6444	0.00072251	0.0470625	0.0452688	IFNAR2/LILRB3/LILRA6/LILRA4/LCK/LILRA2/MAPK11	7
hsa05340	hsa05340	Primary immunodeficiency	4/79	35/6444	0.000820928	0.0470625	0.0452688	ZAP70/CD8A/LCK/CD8B	4
hsa05142	hsa05142	Chagas disease (American trypanosomiasis)	6/79	96/6444	0.0010819	0.0470625	0.0452688	CD247/TLR6/C3/CCL5/IRAK1/MAPK11	6

## Sheet: QP deconv asthma NG
	ID	Description	GeneRatio	BgRatio	pvalue	p.adjust	qvalue	geneID	Count
		no results

## Sheet: QP deconv COPD AM
	ID	Description	GeneRatio	BgRatio	pvalue	p.adjust	qvalue	geneID	Count
		no results

## Sheet: QP deconv COPD NG
	ID	Description	GeneRatio	BgRatio	pvalue	p.adjust	qvalue	geneID	Count
hsa00620	hsa00620	Pyruvate metabolism	17/922	37/6444	3.59994e-06	0.000541508	0.00049089	MDH2/PDHA1/ACAT1/HAGH/MDH1/DLAT/GLO1/GRHPR/LDHD/ACYP1/ME3/LDHB/PCK2/ME1/ALDH3A2/ALDH2/LDHAL6A	17
hsa04714	hsa04714	Thermogenesis	52/922	197/6444	4.47961e-06	0.000541508	0.00049089	NDUFA6/NDUFA9/NDUFB8/NDUFAF5/COX16/NDUFB10/NDUFS8/NDUFA7/COX14/MLST8/NDUFC2/NDUFA5/NDUFB4/COA3/NDUFS3/UQCRH/NDUFAB1/NDUFV1/NDUFA3/NDUFB2/NDUFA8/COX5A/COX20/COX11/ACSL3/RPTOR/ACTL6A/NDUFV3/CREB3L2/CPT1A/NDUFS4/NDUFAF4/NDUFB7/COX6C/UQCRQ/RPS6KA2/COA7/COX7C/COA6/SLC25A20/NDUFA4/COA4/PPARG/NDUFAF3/SMARCE1/GCG/SMARCA4/PRKACB/KRAS/NDUFS5/BMP8B/FGFR1	52
hsa01200	hsa01200	Carbon metabolism	33/922	105/6444	5.12468e-06	0.000541508	0.00049089	GCSH/GOT1/MDH2/ECHS1/PDHA1/ACO2/ACAT1/PCCB/ESD/GOT2/MDH1/DLAT/ACADS/IDH1/SHMT2/ACO1/IDNK/GLUD2/RPE/ADH5/PCCA/ME3/PFKP/GPI/IDH3A/PSPH/SUCLG2/ME1/SDSL/FBP1/PHGDH/GLUD1/PFKM	33
hsa00071	hsa00071	Fatty acid degradation	15/922	38/6444	0.000118119	0.00936091	0.0084859	HADHB/ECI1/ECHS1/ACAT1/ECI2/ACADVL/ACSL3/ACADS/ACAA2/CPT1A/ADH5/HADH/ACADM/ALDH3A2/ALDH2	15
hsa00970	hsa00970	Aminoacyl-tRNA biosynthesis	11/922	24/6444	0.000202409	0.0128328	0.0116332	LARS2/IARS2/GATB/YARS2/VARS2/DARS2/GATC/PARS2/FARSB/EARS2/SARS2	11
hsa05012	hsa05012	Parkinson disease	31/922	118/6444	0.000414227	0.0194909	0.017669	NDUFA6/NDUFA9/NDUFB8/NDUFB10/NDUFS8/NDUFA7/NDUFC2/NDUFA5/NDUFB4/PARK7/NDUFS3/UQCRH/NDUFAB1/VDAC1/NDUFV1/SLC25A5/NDUFA3/NDUFB2/NDUFA8/COX5A/NDUFV3/VDAC2/NDUFS4/NDUFB7/COX6C/UQCRQ/COX7C/NDUFA4/PRKACB/NDUFS5/SNCA	31
hsa01210	hsa01210	2-Oxocarboxylic acid metabolism	8/922	15/6444	0.000430399	0.0194909	0.017669	GOT1/BCAT2/ACO2/ACY1/GOT2/IDH1/ACO1/IDH3A	8
hsa00270	hsa00270	Cysteine and methionine metabolism	15/922	43/6444	0.000575627	0.0204695	0.0185562	GOT1/MDH2/SRM/ENOPH1/GSS/BCAT2/GOT2/MDH1/MTAP/DNMT1/LDHB/APIP/SDSL/PHGDH/LDHAL6A	15
hsa04146	hsa04146	Peroxisome	23/922	80/6444	0.000581154	0.0204695	0.0185562	PRDX1/PXMP4/ABCD4/PAOX/ECH1/ECI2/PEX7/ACSL3/MPV17/IDH1/SLC25A17/CRAT/DDO/SOD1/PEX14/DECR2/PEX19/SCP2/AGPS/PHYH/NUDT19/DHRS4/DHRS4L1	23
hsa01212	hsa01212	Fatty acid metabolism	16/922	49/6444	0.000876294	0.0277785	0.0251819	HADHB/HSD17B12/ECHS1/CBR4/ACAT1/ACADVL/ACSL3/ACADS/ACAA2/CPT1A/ACSF3/HADH/SCP2/ACADM/MECR/HSD17B8	16
hsa00280	hsa00280	Valine, leucine and isoleucine degradation	15/922	45/6444	0.000991719	0.0285795	0.0259081	HADHB/ECHS1/BCAT2/ACAT1/PCCB/ACADS/ACAA2/ACSF3/IVD/PCCA/HSD17B10/HADH/ACADM/ALDH3A2/ALDH2	15
hsa00630	hsa00630	Glyoxylate and dicarboxylate metabolism	10/922	26/6444	0.0020586	0.0516119	0.0467875	GCSH/MDH2/ACO2/ACAT1/PCCB/MDH1/SHMT2/ACO1/PCCA/GRHPR	10
hsa00190	hsa00190	Oxidative phosphorylation	27/922	108/6444	0.00211658	0.0516119	0.0467875	NDUFA6/NDUFA9/NDUFB8/NDUFB10/NDUFS8/NDUFA7/NDUFC2/NDUFA5/NDUFB4/NDUFS3/UQCRH/NDUFAB1/NDUFV1/NDUFA3/NDUFB2/NDUFA8/COX5A/COX11/NDUFV3/NDUFS4/PPA2/NDUFB7/COX6C/UQCRQ/COX7C/NDUFA4/NDUFS5	27
hsa03050	hsa03050	Proteasome	14/922	44/6444	0.00239426	0.0542128	0.0491453	PSMB6/PSMB7/PSMB5/PSMC2/PSMA3/PSMA5/PSMA1/PSMF1/PSMB2/PSMD2/PSME2/PSMD1/PSMD14/PSMD7	14
hsa00020	hsa00020	Citrate cycle (TCA cycle)	10/922	28/6444	0.00388451	0.0789369	0.0715583	MDH2/PDHA1/ACO2/MDH1/DLAT/IDH1/ACO1/IDH3A/SUCLG2/PCK2	10
hsa04142	hsa04142	Lysosome	29/922	124/6444	0.00427344	0.0789369	0.0715583	HYAL2/SCARB2/NAGPA/NAGA/AGA/GM2A/SORT1/FUCA2/PLA2G15/AP1B1/CTSO/ACP2/NAGLU/GNPTAB/GLB1/CTSH/GUSB/GGA2/HEXA/AP1S1/GAA/CTSB/HEXB/LIPA/DNASE2B/DNASE2/LGMN/IDUA/NPC1	29
hsa00062	hsa00062	Fatty acid elongation	8/922	20/6444	0.00434298	0.0789369	0.0715583	HADHB/HSD17B12/ECHS1/ACAA2/HADH/ACOT7/ACOT4/MECR	8
hsa04932	hsa04932	Non-alcoholic fatty liver disease (NAFLD)	32/922	141/6444	0.0045297	0.0789369	0.0715583	NDUFA6/NDUFA9/NDUFB8/NDUFB10/NDUFS8/NDUFA7/PIK3R2/NDUFC2/NDUFA5/NDUFB4/NDUFS3/UQCRH/NDUFAB1/NDUFV1/NDUFA3/NDUFB2/NDUFA8/COX5A/NR1H3/NDUFV3/NDUFS4/NDUFB7/COX6C/UQCRQ/COX7C/NDUFA4/AKT3/CASP7/NDUFS5/CEBPA/BCL2L11/IRS2	32
hsa00240	hsa00240	Pyrimidine metabolism	15/922	52/6444	0.00488443	0.0789369	0.0715583	NME1/ENTPD6/UMPS/DTYMK/RRM1/NT5C/CTPS1/DCTPP1/CAD/NME2/CMPK1/DHODH/CMPK2/TK1/TYMS	15
hsa00010	hsa00010	Glycolysis / Gluconeogenesis	16/922	57/6444	0.00498024	0.0789369	0.0715583	PDHA1/AKR1A1/DLAT/ADH5/G6PC3/GALM/LDHB/PFKP/GPI/PCK2/MINPP1/ALDH3A2/ALDH2/FBP1/PFKM/LDHAL6A	16
hsa00860	hsa00860	Porphyrin and chlorophyll metabolism	9/922	25/6444	0.00572848	0.0864728	0.0783898	UROD/ALAS1/HMBS/FECH/FXN/BLVRA/HMOX2/GUSB/EARS2	9
