# Supplementary material for: Exploration of the sputum methylome and omics deconvolution by quadratic programming in molecular profiling of asthma and COPD: the road to sputum omics 2.0
Source: Respir Res. 2020 Oct 19;21:274. doi: 10.1186/s12931-020-01544-4 (PMC7574293; doi:10.1186/s12931-020-01544-4)
Supplement: Supplementary file 8 — Additional file 8. Results of KEGG pathway enrichment analyses of the methylation data. [file 12931_2020_1544_MOESM8_ESM.xlsx]

## Sheet: mixed cells asthma
	ID	Description	GeneRatio	BgRatio	pvalue	p.adjust	qvalue	geneID	Count
hsa04940	hsa04940	Type I diabetes mellitus	6/88	41/6995	1.05427e-05	0.00208745	0.00187549	TNF/HLA-DRA/PTPRN2/HLA-DOB/ICA1/GAD2	6
hsa05133	hsa05133	Pertussis	6/88	74/6995	0.000311698	0.0251714	0.0226155	TNF/SERPING1/C1S/C4BPA/ITGB2/C2	6
hsa05322	hsa05322	Systemic lupus erythematosus	5/88	50/6995	0.000381385	0.0251714	0.0226155	TNF/HLA-DRA/C1S/HLA-DOB/C2	5
hsa05323	hsa05323	Rheumatoid arthritis	6/88	87/6995	0.000745822	0.0317087	0.0284889	TNF/HLA-DRA/TGFB1/HLA-DOB/ATP6V1F/ITGB2	6
hsa05152	hsa05152	Tuberculosis	8/88	162/6995	0.000928888	0.0317087	0.0284889	TNF/HLA-DRA/SRC/LSP1/TGFB1/HLA-DOB/PPP3CC/ITGB2	8
hsa04612	hsa04612	Antigen processing and presentation	5/88	61/6995	0.000960868	0.0317087	0.0284889	TNF/HLA-DRA/TAPBP/HLA-DOB/TAP2	5
hsa05140	hsa05140	Leishmaniasis	5/88	67/6995	0.00147045	0.0415927	0.0373693	TNF/HLA-DRA/TGFB1/HLA-DOB/ITGB2	5
hsa04610	hsa04610	Complement and coagulation cascades	5/88	81/6995	0.00340023	0.0841556	0.0756103	SERPING1/C1S/C4BPA/ITGB2/C2	5
hsa05310	hsa05310	Asthma	3/88	27/6995	0.00452422	0.0873823	0.0785093	TNF/HLA-DRA/HLA-DOB	3
hsa05150	hsa05150	Staphylococcus aureus infection	5/88	87/6995	0.00462377	0.0873823	0.0785093	HLA-DRA/C1S/HLA-DOB/ITGB2/C2	5
hsa04658	hsa04658	Th1 and Th2 cell differentiation	5/88	88/6995	0.00485457	0.0873823	0.0785093	HLA-DRA/MAML2/HLA-DOB/RUNX3/PPP3CC	5
hsa04514	hsa04514	Cell adhesion molecules (CAMs)	6/88	131/6995	0.00594789	0.0981403	0.0881749	HLA-DRA/PTPRF/PDCD1/CDH5/HLA-DOB/ITGB2	6

## Sheet: mixed cells COPD
	ID	Description	GeneRatio	BgRatio	pvalue	p.adjust	qvalue	geneID	Count
hsa04640	hsa04640	Hematopoietic cell lineage	13/326	91/6995	0.000274575	0.0356318	0.0339481	CD5/CD59/HLA-DRA/FCER2/HLA-DOB/CD1C/CD38/CD22/CD7/CD2/IL1R1/CD1D/HLA-DMB	13
hsa04610	hsa04610	Complement and coagulation cascades	12/326	81/6995	0.000333193	0.0356318	0.0339481	C1S/C1QA/C1QB/VWF/SERPING1/CD59/SERPINA1/ITGB2/F2RL2/C2/CFB/C1QC	12
hsa05322	hsa05322	Systemic lupus erythematosus	9/326	50/6995	0.000427909	0.0356318	0.0339481	C1S/C1QA/C1QB/HLA-DRA/HLA-DOB/C2/CTSG/C1QC/HLA-DMB	9
hsa05133	hsa05133	Pertussis	11/326	74/6995	0.000569841	0.0356318	0.0339481	C1S/C1QA/C1QB/SERPING1/IRF8/ITGB2/CASP1/C2/CASP7/IL23A/C1QC	11
hsa05150	hsa05150	Staphylococcus aureus infection	12/326	87/6995	0.000650215	0.0356318	0.0339481	C1S/C1QA/C1QB/DEFA4/HLA-DRA/ITGB2/ITGAL/HLA-DOB/C2/CFB/C1QC/HLA-DMB	12

## Sheet: QP deconv asthma AM
	ID	Description	GeneRatio	BgRatio	pvalue	p.adjust	qvalue	geneID	Count
hsa04612	hsa04612	Antigen processing and presentation	21/1053	61/6995	0.000129359	0.0415241	0.0409862	HLA-DMA/TAPBP/TAP1/HLA-DOA/TAP2/HLA-DPA1/HLA-DPB1/HLA-E/HLA-DMB/HSPA2/HSPA1B/HSP90AB1/HSPA4/TNF/HSPA1A/HSPA1L/CD8A/CD4/CANX/HLA-F/NFYC	21

## Sheet: QP deconv asthma NG
	ID	Description	GeneRatio	BgRatio	pvalue	p.adjust	qvalue	geneID	Count
		no results

## Sheet: QP deconv COPD AM
	ID	Description	GeneRatio	BgRatio	pvalue	p.adjust	qvalue	geneID	Count
hsa05416	hsa05416	Viral myocarditis	14/608	55/6995	0.000183113	0.0567651	0.0499225	HLA-DMB/ITGB2/CAV1/HLA-DQA2/CD40/ITGAL/CCND1/EIF4G1/HLA-B/HLA-DMA/HLA-DRA/HLA-E/MYH7/HLA-F	14
hsa04510	hsa04510	Focal adhesion	30/608	188/6995	0.000748934	0.0628722	0.0552933	PDGFRA/TNXB/LAMA3/CCND2/PTEN/SRC/COL9A3/HRAS/PPP1CA/CAV2/CHAD/CAV1/LAMB2/LAMA4/PDGFB/VTN/CCND1/MAPK8/PIK3CD/SHC3/MYLK4/COL2A1/PIP5K1C/FLT1/ITGA7/MYL5/ROCK1/COL9A2/THBS1/PIK3R2	30
hsa04211	hsa04211	Longevity regulating pathway	17/608	86/6995	0.000987714	0.0628722	0.0552933	ATF6B/EHMT2/HRAS/TSC2/EIF4E/RPTOR/STK11/KL/PIK3CD/KRAS/RB1CC1/APPL1/ADCY6/CAMKK2/PRKAA2/PIK3R2/ATG5	17
hsa01212	hsa01212	Fatty acid metabolism	12/608	51/6995	0.00112045	0.0628722	0.0552933	HSD17B8/ACSL6/PPT2/CBR4/HSD17B4/ACSF3/ELOVL5/HSD17B12/CPT1A/TECR/FADS1/FADS2	12
hsa05219	hsa05219	Bladder cancer	10/608	39/6995	0.00142643	0.0628722	0.0552933	RASSF1/SRC/HRAS/CCND1/MAP2K2/DAPK3/FGFR3/KRAS/CDH1/THBS1	10
hsa04612	hsa04612	Antigen processing and presentation	13/608	61/6995	0.00187279	0.0628722	0.0552933	TAPBP/TAP1/HSPA1L/HLA-DMB/HLA-DQA2/TNF/HSPA1A/LGMN/HLA-B/HLA-DMA/HLA-DRA/HLA-E/HLA-F	13
hsa04810	hsa04810	Regulation of actin cytoskeleton	30/608	199/6995	0.00189988	0.0628722	0.0552933	PDGFRA/FGFR2/GNA12/FGF20/SRC/HRAS/PPP1CA/ITGB2/MYH10/SPATA13/PDGFB/RDX/ITGAL/ARHGEF1/FGF2/MAP2K2/ARHGEF7/PIK3CD/FGF23/MYLK4/FGFR3/KRAS/PIP5K1C/EZR/ITGA7/MYL5/ROCK1/CFL2/PIK3R2/ARHGEF4	30
hsa05330	hsa05330	Allograft rejection	9/608	34/6995	0.00192771	0.0628722	0.0552933	HLA-DMB/HLA-DQA2/CD40/TNF/HLA-B/HLA-DMA/HLA-DRA/HLA-E/HLA-F	9
hsa04144	hsa04144	Endocytosis	33/608	226/6995	0.00198266	0.0628722	0.0552933	PDGFRA/FGFR2/HSPA1L/PARD6B/AGAP1/SRC/HRAS/CYTH1/CAV2/CAV1/SMAD3/RAB5B/SMAP2/EHD2/HSPA1A/ACAP3/ARFGAP2/RNF41/AGAP3/KIF5B/FGFR3/AP2B1/ARF6/RAB11FIP1/IQSEC1/HLA-B/PARD6G/PIP5K1C/HLA-E/ARAP1/GRK7/HGS/HLA-F	33
hsa04940	hsa04940	Type I diabetes mellitus	10/608	41/6995	0.00214673	0.0628722	0.0552933	PTPRN2/HLA-DMB/LTA/HLA-DQA2/TNF/HLA-B/HLA-DMA/HLA-DRA/HLA-E/HLA-F	10
hsa01521	hsa01521	EGFR tyrosine kinase inhibitor resistance	15/608	77/6995	0.00224151	0.0628722	0.0552933	PDGFRA/FGFR2/PTEN/SRC/HRAS/EIF4E/PDGFB/FGF2/MAP2K2/PIK3CD/SHC3/FGFR3/KRAS/PLCG2/PIK3R2	15
hsa05166	hsa05166	Human T-cell leukemia virus 1 infection	31/608	211/6995	0.00243376	0.0628722	0.0552933	ATF6B/MAD1L1/KAT5/CCND2/HLA-DMB/PTEN/LTA/HRAS/ITGB2/HLA-DQA2/CCNA1/SMAD3/CD40/TNF/STAT5A/ITGAL/CCND1/MAP2K2/MAPK8/PIK3CD/KRAS/LCK/HLA-B/HLA-DMA/CRTC1/HLA-DRA/HLA-E/ADCY6/PIK3R2/MAP2K4/HLA-F	31
hsa04140	hsa04140	Autophagy - animal	20/608	121/6995	0.00361793	0.0835756	0.0735012	PTEN/HRAS/TSC2/ATG2A/RPTOR/STK11/BNIP3/MAP2K2/GABARAP/MAPK8/PIK3CD/DAPK3/KRAS/MTMR14/RRAGA/RB1CC1/CAMKK2/PRKAA2/PIK3R2/ATG5	20
hsa05169	hsa05169	Epstein-Barr virus infection	27/608	182/6995	0.0039422	0.0835756	0.0735012	TAPBP/TAP1/RUNX3/NCOR2/CCND2/HLA-DMB/FCER2/ENTPD1/HLA-DQA2/CCNA1/SIN3A/CD40/APAF1/TNF/ITGAL/CCND1/MAPK8/PIK3CD/ADRM1/HLA-B/HLA-DMA/HLA-DRA/HLA-E/PLCG2/PIK3R2/MAP2K4/HLA-F	27
hsa04151	hsa04151	PI3K-Akt signaling pathway	43/608	329/6995	0.00404398	0.0835756	0.0735012	ATF6B/PDGFRA/TNXB/LAMA3/FGFR2/OSM/IGF2/CCND2/PTEN/FGF20/COL9A3/HRAS/EFNA3/CHAD/PPP2R5B/TSC2/LAMB2/EIF4E/RPTOR/LAMA4/PDGFB/STK11/BRCA1/VTN/FGF2/CCND1/MAP2K2/PPP2R2B/ANGPT4/PIK3CD/FGF23/MAGI2/FGFR3/COL2A1/KRAS/PPP2R2C/FLT1/ITGA7/PKN1/COL9A2/THBS1/PRKAA2/PIK3R2	43
hsa04919	hsa04919	Thyroid hormone signaling pathway	19/608	115/6995	0.00453012	0.0835878	0.0735119	NOTCH4/ATP1A3/RXRB/MED12L/SRC/HRAS/TSC2/SIN3A/ATP1B2/CCND1/MAP2K2/PFKP/PIK3CD/KRAS/PLCG2/DIO3/PLCD3/PIK3R2/MYH7	19
hsa04390	hsa04390	Hippo signaling pathway	23/608	149/6995	0.00458385	0.0835878	0.0735119	TP73/CTNNA1/CCND2/PARD6B/RASSF1/TEAD3/WNT5B/PPP1CA/ITGB2/GDF6/SMAD3/NF2/FRMD6/CCND1/PPP2R2B/WWTR1/STK3/SCRIB/AMH/PPP2R2C/CDH1/PARD6G/SOX2	23
hsa04950	hsa04950	Maturity onset diabetes of the young	7/608	26/6995	0.00549921	0.0947086	0.0832921	HHEX/HNF1A/NKX6-1/BHLHA15/PDX1/NKX2-2/PAX6	7
hsa05320	hsa05320	Autoimmune thyroid disease	9/608	40/6995	0.00628281	0.0969291	0.0852449	HLA-DMB/HLA-DQA2/CD40/TPO/HLA-B/HLA-DMA/HLA-DRA/HLA-E/HLA-F	9
hsa04917	hsa04917	Prolactin signaling pathway	13/608	70/6995	0.00656616	0.0969291	0.0852449	CCND2/SRC/HRAS/ELF5/STAT5A/CCND1/MAP2K2/MAPK8/PIK3CD/SHC3/KRAS/TNFRSF11A/PIK3R2	13
hsa05218	hsa05218	Melanoma	13/608	70/6995	0.00656616	0.0969291	0.0852449	PDGFRA/PTEN/FGF20/HRAS/PDGFB/FGF2/CCND1/MAP2K2/PIK3CD/FGF23/KRAS/CDH1/PIK3R2	13
hsa05310	hsa05310	Asthma	7/608	27/6995	0.00687956	0.0969393	0.0852539	FCER1G/HLA-DMB/HLA-DQA2/CD40/TNF/HLA-DMA/HLA-DRA	7
hsa05332	hsa05332	Graft-versus-host disease	8/608	34/6995	0.00739618	0.0996877	0.087671	HLA-DMB/HLA-DQA2/TNF/HLA-B/HLA-DMA/HLA-DRA/HLA-E/HLA-F	8

## Sheet: QP deconv COPD NG
	ID	Description	GeneRatio	BgRatio	pvalue	p.adjust	qvalue	geneID	Count
		no results
